# Supplementary material
Source: Springer Nature journal article supplement (https://www.springermedizin.de/resource/supplementary/13012_2010_456_MOESM1_ESM.pdf/9629724)

Project research collaborating institutions

Country Research Project Team

Action Research Team

Project focal person

Council Health Management Team

Planning & priority setting at the district

Community

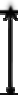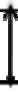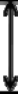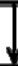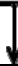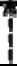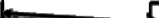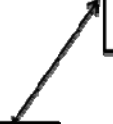

Supplement: MOESM1 [file 9629724]
